# Supplementary material for: Induction of Endoplasmic Reticulum Stress-Mediated Apoptosis by Aminosteroid RM-581 Efficiently Blocks the Growth of PC-3 Cancer Cells and Tumors Resistant or Not to Docetaxel
Source: MDPI journal article supplement (doi:10.3390/ijms222011181), 2021-10-17

## Supplementary Materials

### **Induction of endoplasmic reticulum stress-mediated apoptosis by aminosteroid RM-581 efficiently blocks the growth of PC-3 docetaxel-resistant prostate cancer cells and tumors**

René Maltais <sup>1</sup>, Jenny Roy <sup>1</sup>, Martin Perreault <sup>1</sup>, Sachiko Sato <sup>2</sup>, Julie-Christine Lévesque <sup>2</sup>, and Donald Poirier <sup>1,3,\*</sup>

<sup>1</sup> *Laboratory of Medicinal Chemistry, Endocrinology and Nephrology Unit, CHU de Québec Research Center, Québec, QC, G1V 4G2, Canada.*

<sup>2</sup> *Bioimaging platform, CHUL-CHU de Québec Research Centre, Faculty of Medicine, Laval University, Québec, QC, G1V 4G2, Canada.*

<sup>3</sup> *Department of Molecular Medicine, Faculty of Medicine, Université Laval, Québec, QC, G1V 0A6, Canada.*

## Supplementary Materials

|                                                                                                                                 |    |
|---------------------------------------------------------------------------------------------------------------------------------|----|
| Table of contents.....                                                                                                          | 1  |
| Table S1. Calculated physicochemical and ADME properties of RM-581-Fluo.....                                                    | 2  |
| Table S2. Calculated physicochemical and ADME properties of RM-581 .....                                                        | 3  |
| Table S3. List of fatty acids dosed in PC-3 tumors.....                                                                         | 4  |
| Table S4. Primer sequences.....                                                                                                 | 6  |
| Figure S1. Cell proliferation and EC <sub>50</sub> values in LNCaP (A), DU-145 (B) and PC-3 (C) cells treated with RM-581 ..... | 7  |
| Figure S2. Emission spectra of RM-581-Fluo at different pH and concentrations .....                                             | 8  |
| Figure S3. Three additional confocal imaging pictures from a second experiment with RM-581-Fluo in PC-3 cells .....             | 10 |
| Figure S4. Cell proliferation and EC <sub>50</sub> values after continuous exposure to RM-581 in PC-3 cells .....               | 13 |

**Table S1.** Calculated physicochemical and ADME properties of RM-581-Fluo

[<http://www.swissadme.ch/faq.php>]. Copyright [2021] [SwissADME].

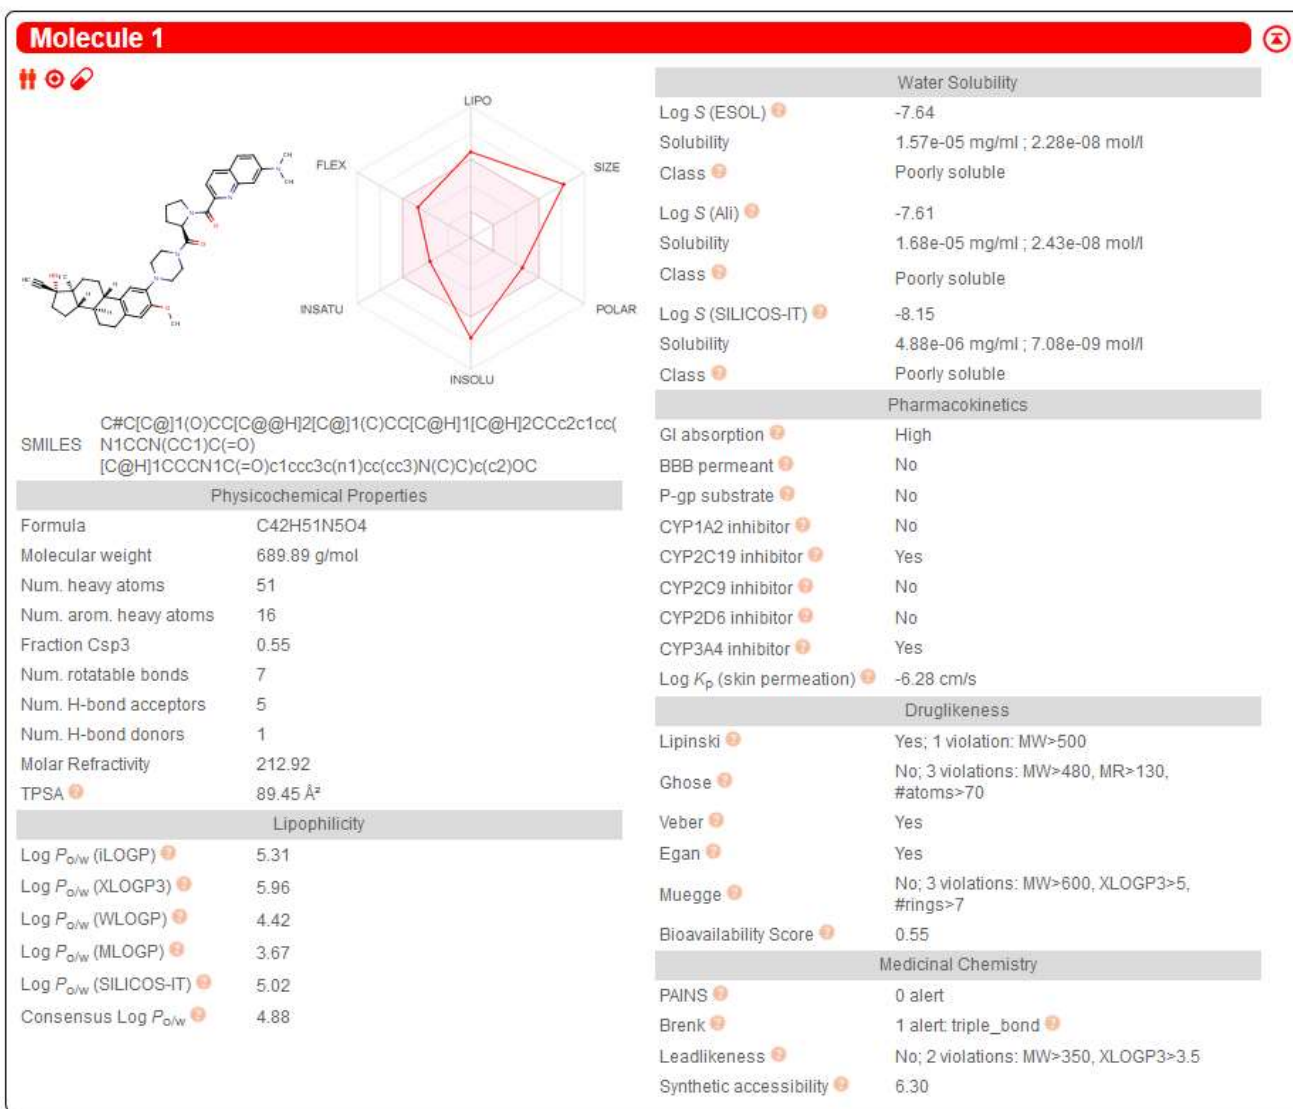

**Table S2.** Calculated physicochemical and ADME properties of RM-581

[<http://www.swissadme.ch/faq.php>]. Copyright [2021] [SwissADME].

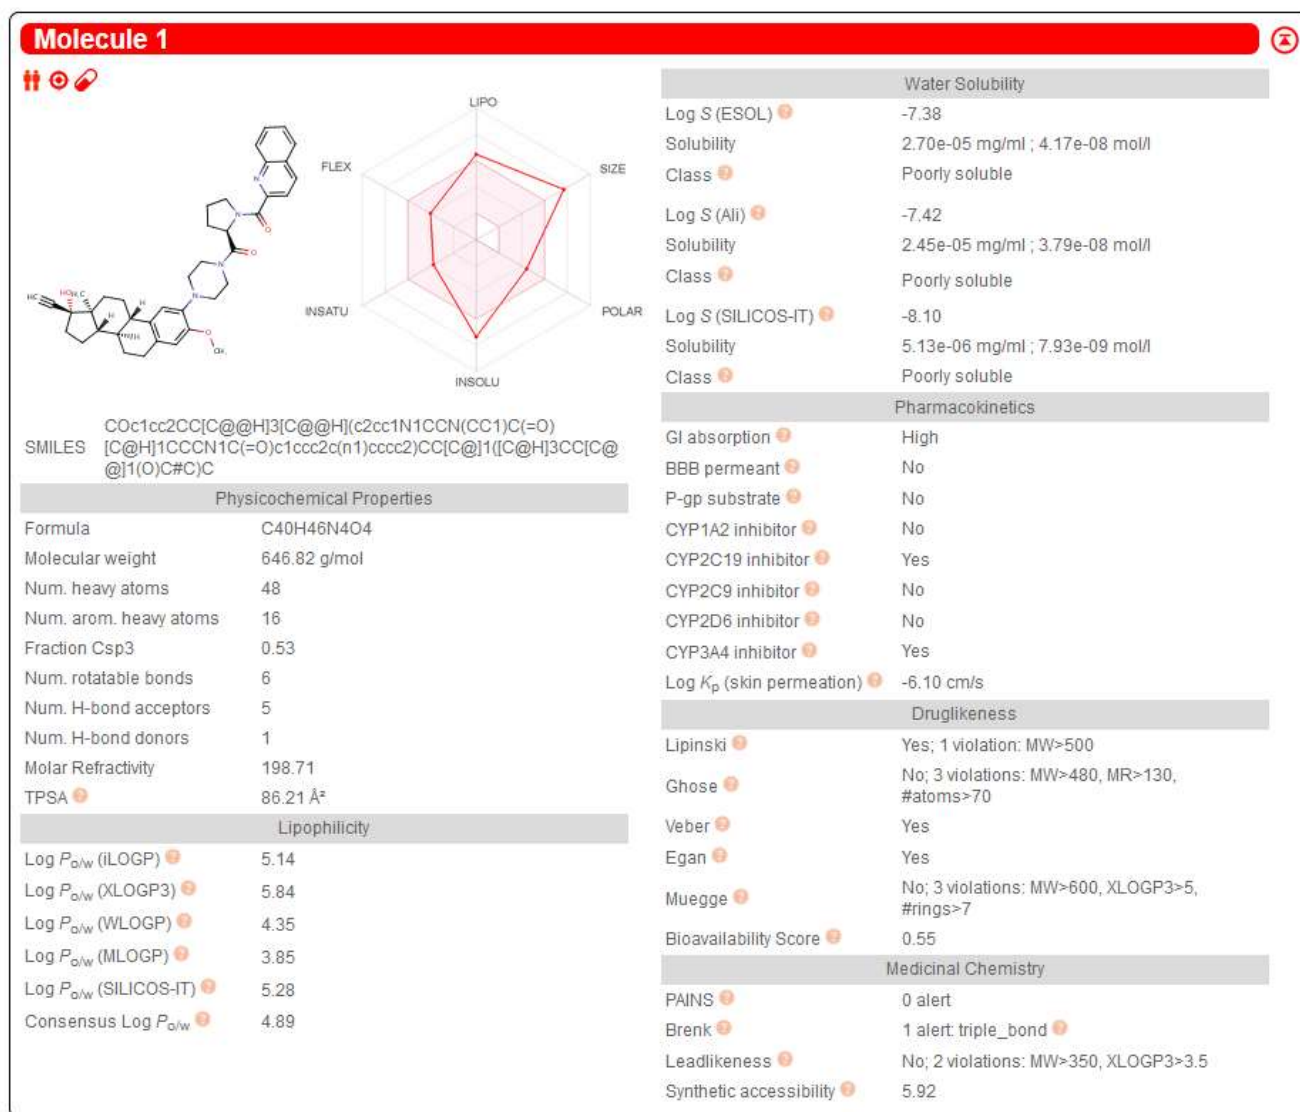

**Table S3.** List of fatty acids dosed in human PC-3 tumors

| Fatty acids (FA)               | Common name          | CTL group (PC-3 tumor) |                   | RM-581 (PC-3 tumor) |                   |
|--------------------------------|----------------------|------------------------|-------------------|---------------------|-------------------|
|                                |                      | %                      | mg FA/g of tissue | %                   | mg FA/g of tissue |
| <b>C8:0</b>                    |                      | 0.00                   | 0.00              | 0.00                | 0.00              |
| <b>C10:0</b>                   |                      | 0.00                   | 0.00              | 0.00                | 0.00              |
| <b>C12:0</b>                   |                      | 0.17                   | 0.03              | 0.15                | 0.02              |
| <b>14:0</b>                    | Myristic acid        | 1.48                   | 0.22              | 1.35                | 0.16              |
| <b>9t-14:1 n5</b>              |                      | 0.00                   | 0.00              | 0.00                | 0.00              |
| <b>9c-14:1 n5</b>              | Myristoleic acid     | 0.15                   | 0.02              | 0.12                | 0.01              |
| <b>C15:0</b>                   |                      | 0.15                   | 0.02              | 0.17                | 0.02              |
| <b>C16:0 DMA</b>               |                      | 0.00                   | 0.00              | 0.04                | 0.01              |
| <b>C15:1 n5t</b>               |                      | 0.17                   | 0.03              | 0.19                | 0.02              |
| <b>C15:1 n5c</b>               |                      | 0.00                   | 0.00              | 0.00                | 0.00              |
| <b>C15:1 n1c</b>               |                      | 0.00                   | 0.00              | 0.00                | 0.00              |
| <b>16:0</b>                    | Palmitic acid        | 19.59                  | 2.98              | 18.71               | 2.22              |
| <b>9t-16:1 n7</b>              | Palmitelaidic acid   | 0.00                   | 0.00              | 0.00                | 0.00              |
| <b>C17:0 isobranched</b>       |                      | 0.00                   | 0.00              | 0.00                | 0.00              |
| <b>9c-16:1 n7</b>              | Palmitoleic acid     | 9.87                   | 1.50              | 6.96                | 0.83              |
| <b>C18:0 DMA</b>               |                      | 0.00                   | 0.00              | 0.00                | 0.00              |
| <b>C17:1 n7t</b>               |                      | 0.12                   | 0.02              | 0.13                | 0.02              |
| <b>C18:1 DMA</b>               |                      | 0.18                   | 0.03              | 0.20                | 0.02              |
| <b>C17:1 n7c</b>               |                      | 0.00                   | 0.00              | 0.00                | 0.00              |
| <b>18:0</b>                    | Stearic acid         | 2.77                   | 0.42              | 3.30                | 0.39              |
| <b>6t-18:1 n12</b>             | Petroselaidic acid   | 0.00                   | 0.00              | 0.00                | 0.00              |
| <b>9t-18:1 n9</b>              | Elaidic acid         | 0.01                   | 0.00              | 0.00                | 0.00              |
| <b>11t-18:1 n7</b>             | Transvaccenic acid   | 0.07                   | 0.01              | 0.13                | 0.02              |
| <b>7c-18:1 n11/6c-18:1 n12</b> | /Petroselinic acid   | 0.00                   | 0.00              | 0.00                | 0.00              |
| <b>9c-18:1 n9</b>              | Oleic acid           | 31.44                  | 4.78              | 30.38               | 3.61              |
| <b>11c-18:1 n7</b>             | Vaccenic acid        | 2.05                   | 0.31              | 2.05                | 0.24              |
| <b>12c-18:1 n6</b>             |                      | 0.00                   | 0.00              | 0.00                | 0.00              |
| <b>13c-18:1 n5</b>             |                      | 0.03                   | 0.00              | 0.03                | 0.00              |
| <b>9t12t-18:2 n6</b>           | Linolelaidic acid    | 0.00                   | 0.00              | 0.00                | 0.00              |
| <b>9c12t-18:2 n6</b>           |                      | 0.09                   | 0.01              | 0.11                | 0.01              |
| <b>9t12c-18:2 n6</b>           |                      | 0.00                   | 0.00              | 0.00                | 0.00              |
| <b>9c12c-18:2 n6 (LA)</b>      | Linoleic acid        | 26.27                  | 3.99              | 28.90               | 3.44              |
| <b>9t12t15t-18:3 n3</b>        |                      | 0.06                   | 0.01              | 0.04                | 0.00              |
| <b>20:0</b>                    | Arachidic acid       | 0.19                   | 0.03              | 0.25                | 0.03              |
| <b>6c9c12c-18:3 n6</b>         | gamma-Linolenic acid | 0.06                   | 0.01              | 0.06                | 0.01              |
| <b>9c12c15c-18:3 n3 (ALA)</b>  | alpha-Linolenic acid | 1.18                   | 0.18              | 1.25                | 0.15              |
| <b>8c-20:1 n12</b>             |                      | 0.00                   | 0.00              | 0.00                | 0.00              |
| <b>11c-20:1 n9</b>             | Gondoic acid         | 0.58                   | 0.09              | 0.61                | 0.07              |

|                                |                             |               |              |               |              |
|--------------------------------|-----------------------------|---------------|--------------|---------------|--------------|
| 6c9c12c15c-18:4 n3             | Stearidonic acid            | 0.04          | 0.01         | 0.04          | 0.00         |
| 11c14c-20:2 n6                 |                             | 0.31          | 0.05         | 0.48          | 0.06         |
| 22:0                           | Behenic acid                | 0.08          | 0.01         | 0.09          | 0.01         |
| 8c11c14c-20:3 n6               | Dihomo-gamma-linolenic acid | 0.47          | 0.07         | 0.76          | 0.09         |
| C22:1 n9t                      |                             | 0.00          | 0.00         | 0.00          | 0.00         |
| 11c14c17c-20:3 n3 (ETE)        |                             | 0.02          | 0.00         | 0.03          | 0.00         |
| 5c8c11c14c-20:4 n6 (AA)        | Arachidonic acid            | 0.71          | 0.11         | 1.04          | 0.12         |
| 13c-22:1 n9                    | Erucic acid                 | 0.07          | 0.01         | 0.08          | 0.01         |
| 8c11c14c17c-20:4 n3 (ETA)      |                             | 0.01          | 0.00         | 0.04          | 0.00         |
| 13c16c-22:2 n6                 |                             | 0.03          | 0.00         | 0.05          | 0.01         |
| 5c8c11c14c17c-20:5 n3 (EPA)    | Timnodonic acid             | 0.02          | 0.00         | 0.02          | 0.00         |
| 24:0                           | Lignoceric acid             | 0.30          | 0.05         | 0.32          | 0.04         |
| 13c16c19c-22:3 n3              |                             | 0.00          | 0.00         | 0.00          | 0.00         |
| 15c-24:1 n9                    | Nervonic acid               | 0.05          | 0.01         | 0.06          | 0.01         |
| 7c10c13c16c-22:4 n6            | Adrenic acid                | 0.54          | 0.08         | 0.82          | 0.10         |
| 4c7c10c13c16c-22:5 n6          | Adrenic acid                | 0.14          | 0.02         | 0.20          | 0.02         |
| 7c10c13c16c19c-22:5 n3 (DPA)   |                             | 0.15          | 0.02         | 0.22          | 0.03         |
| 4c7c10c13c16c19c-22:6 n3 (DHA) | Cervonic acid               | 0.37          | 0.06         | 0.58          | 0.07         |
| <b>Total</b>                   |                             | <b>100.00</b> | <b>15.20</b> | <b>100.00</b> | <b>11.89</b> |

|                             |
|-----------------------------|
| <b>n-3/n-6 (0,20 à0,33)</b> |
| <b>n-6 total</b>            |
| <b>n-3 total</b>            |

|       |      |       |      |
|-------|------|-------|------|
| 0.06  | 0.06 | 0.07  | 0.07 |
| 28.63 | 4.35 | 32.42 | 3.85 |
| 1.81  | 0.28 | 2.18  | 0.26 |

|                                 |
|---------------------------------|
| <b>Saturated</b>                |
| <b>P (n-3 &amp; 6)/S</b>        |
| <b>Polyunsaturated n3 cis</b>   |
| <b>Polyunsaturated n6 cis</b>   |
| <b>Polyunsaturated n3 trans</b> |
| <b>Polyunsaturated n6 trans</b> |

|       |       |       |      |
|-------|-------|-------|------|
| 24.73 | 3.76  | 24.40 | 2.90 |
| 1.23  | 1.23  | 1.42  | 1.42 |
| 1.75  | 0.27  | 2.14  | 0.25 |
| 28.52 | 4.33  | 32.29 | 3.84 |
| 0.06  | 0.01  | 0.04  | 0.00 |
| 0.09  | 0.01  | 0.11  | 0.01 |
|       |       |       |      |
| 0.37  | 0.06  | 0.44  | 0.05 |
|       |       |       |      |
| 44.24 | 6.72  | 40.29 | 4.79 |
| 0.00  | 0.00  | 0.00  | 0.00 |
|       |       |       |      |
| 0.52  | 0.08  | 0.60  | 0.07 |
| 74.57 | 11.33 | 74.77 | 8.89 |

|                              |
|------------------------------|
| <b>Monounsaturated trans</b> |
|------------------------------|

|                               |
|-------------------------------|
| <b>Monounsaturated cis</b>    |
| <b>Monounsaturated n6 cis</b> |

|                    |
|--------------------|
| <b>Total trans</b> |
| <b>Total cis</b>   |

|                             |
|-----------------------------|
| <b>Total of omega-6 cis</b> |
|-----------------------------|

|       |      |       |      |
|-------|------|-------|------|
| 28.54 | 4.34 | 32.31 | 3.84 |
|-------|------|-------|------|

**Table S4.** Primer sequences

|      | <b>Forward sequence</b>   | <b>Reverse sequence</b>   |
|------|---------------------------|---------------------------|
| HMGR | TTCGGTGGCCTCTAGTGAGA      | AAAGCTTCATTCAAGCCTGTCA    |
| FASN | ATGGAGGAGGTGGTGATTGC      | CTGGGCCCTCTGAAGTCGAA      |
| BIP  | CTTGGTATTGAAACTGTGGGAGGTG | TTCCAGTCAGATCAAATGTACCCAG |
| CHOP | GGAGGAGCCAGAACCAGCAGA     | TTCCGTTTCCTGGTTCTCCCTT    |
| HERP | TGCATCAGGGGCTTTTGTTC      | AACCACTTGAGGAGCAGCATTCT   |

**Figure S1.** Cell proliferation and EC<sub>50</sub> values in LNCaP (A), DU-145 (B) and PC-3 (C) cells treated with RM-581. EC<sub>50</sub> values of 1.2, 4.4 and 1.2  $\mu$ M were obtained for LNCaP, DU-145 and PC-3 cells, respectively.

**A) LNCaP Cells**

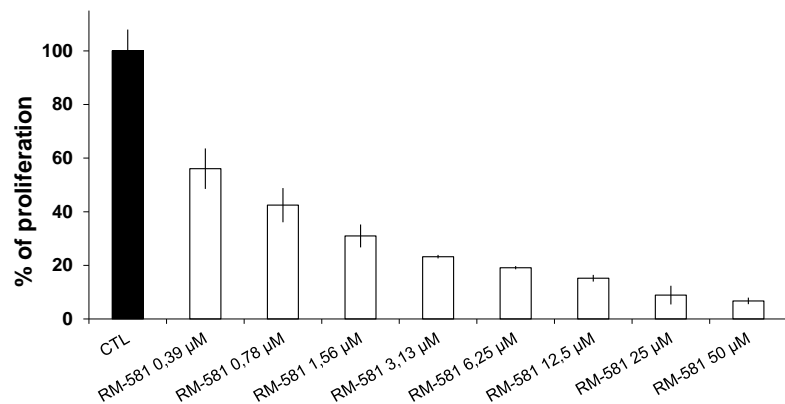

**B) DU-145 Cells**

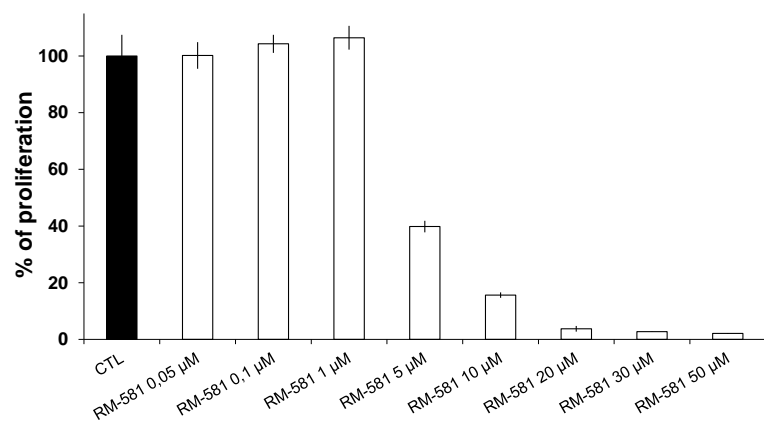

**C) PC-3 Cells**

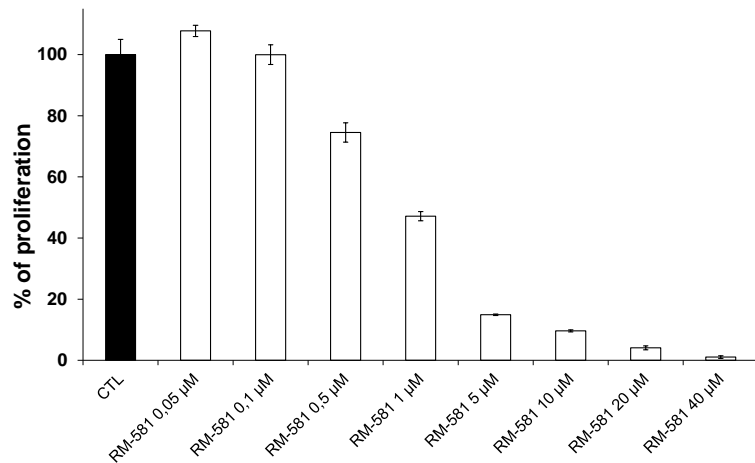

**Figure S2.** Emission spectra of RM-581-Fluo at different pH and concentrations

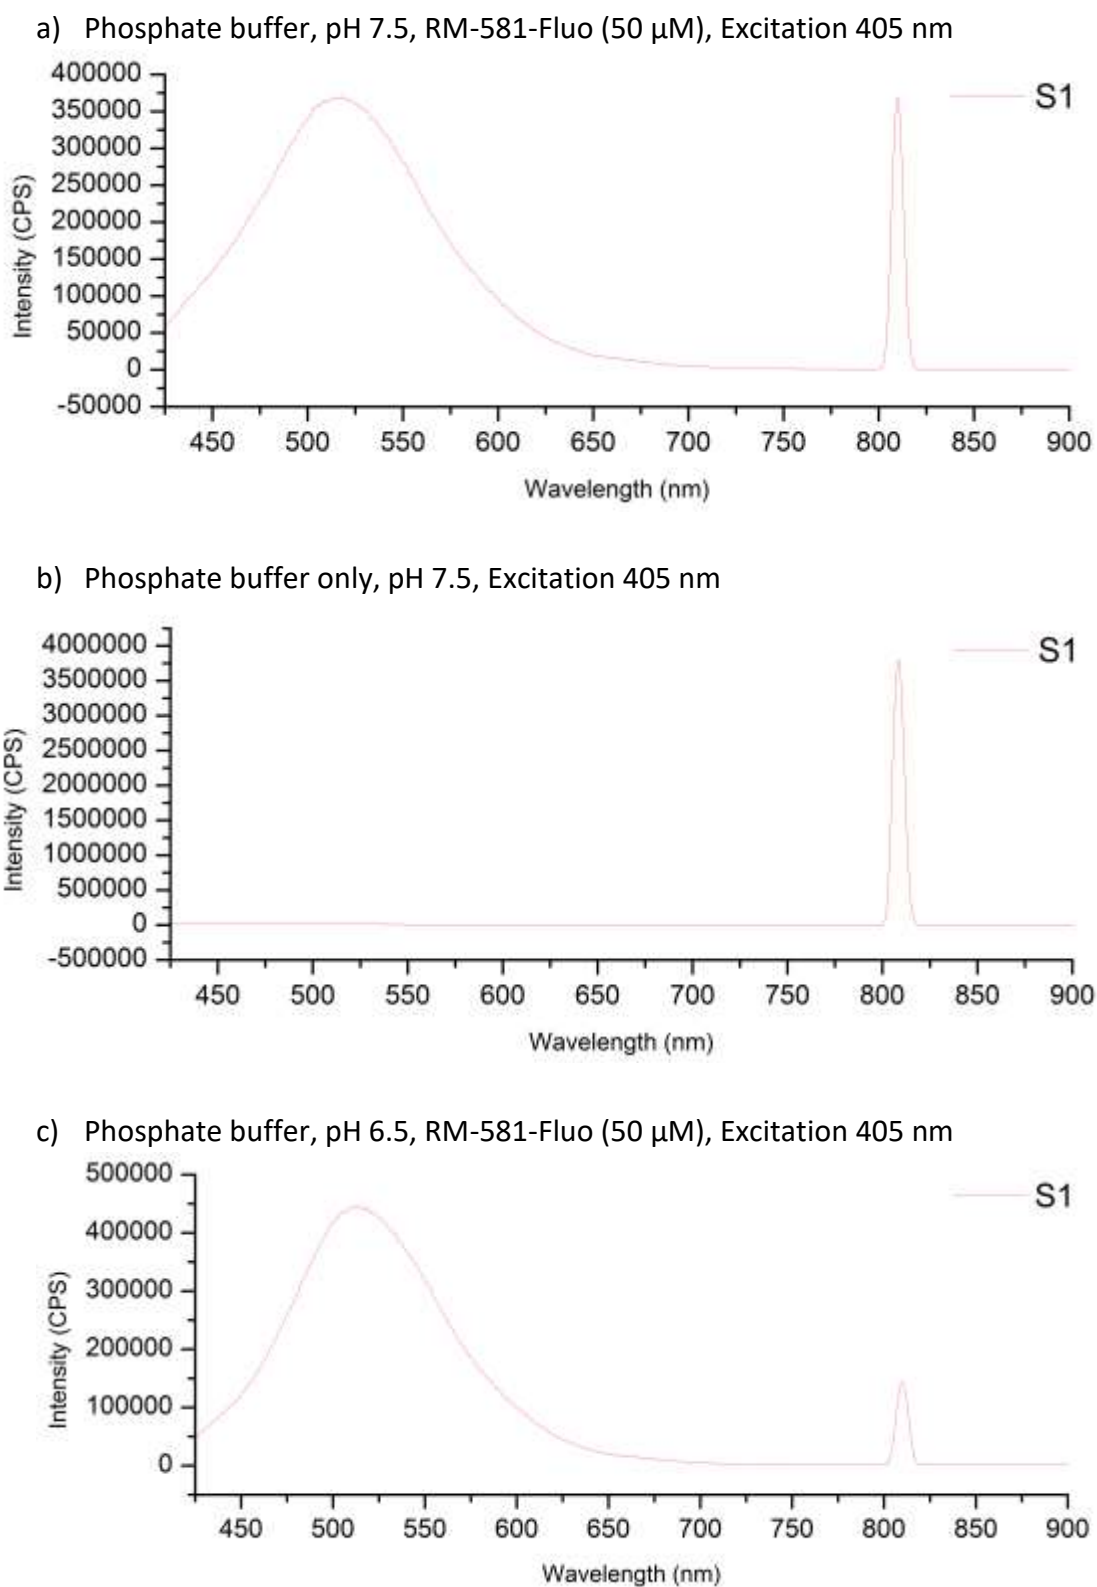



d) Phosphate buffer, pH 5.5, RM-581-Fluo (50  $\mu$ M), Excitation 405 nm

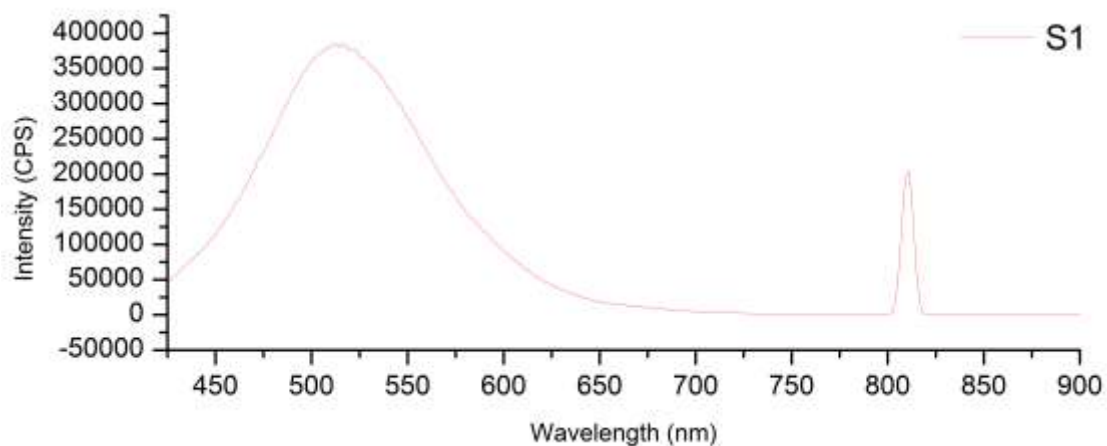

e) Phosphate buffer, pH 7.5, RM-581-Fluo (30  $\mu$ M), Excitation 405 nm

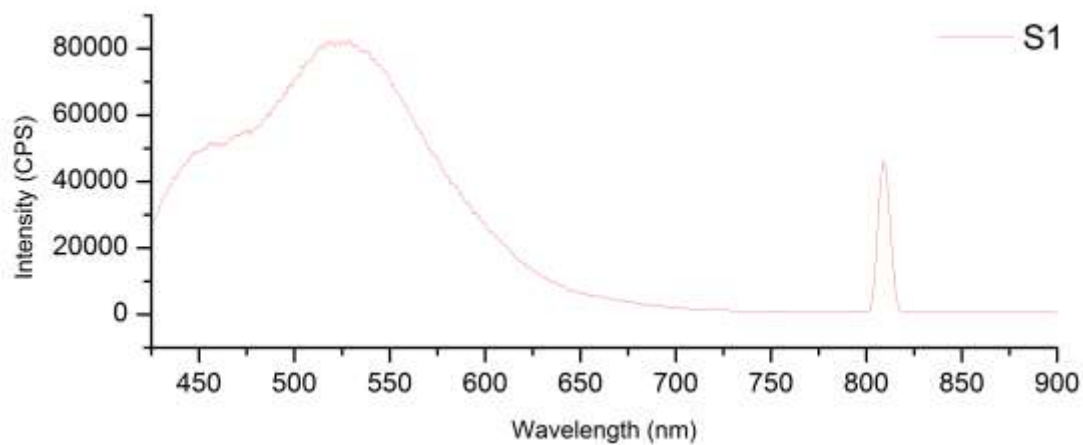

f) Phosphate buffer, pH 7.5, RM-581-Fluo (5  $\mu$ M), Excitation 405 nm

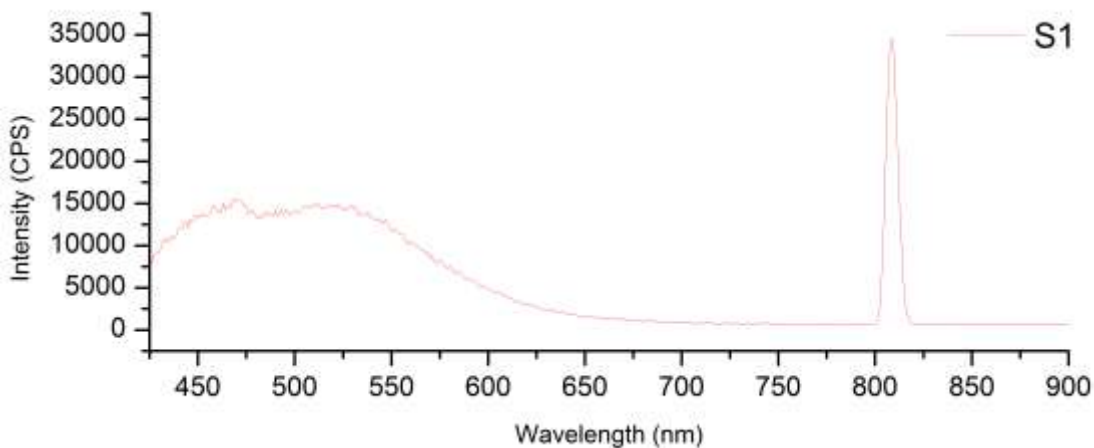

**Figure S3.** Three additional confocal imaging pictures from a second experiment with RM-581-Fluo in PC-3 cells. PC-3 cells were treated 2 h with 15  $\mu$ M of RM-581-Fluo prior microscopy. **(A)** Cellular localization of RM-581-Fluo in blue ( $\lambda_{\text{ex}}$  405 nm,  $\lambda_{\text{em}}$  460/50 nm); **(B)** Cellular localization of RM-581-Fluo in green ( $\lambda_{\text{ex}}$  405 nm,  $\lambda_{\text{em}}$  525/50 nm); **(C)** Cellular localization of ER-Tracker in red ( $\lambda_{\text{ex}}$  561 nm,  $\lambda_{\text{em}}$  593/40 nm); **(D)** Cellular localization of Cell-mask in cyan ( $\lambda_{\text{ex}}$  642 nm,  $\lambda_{\text{em}}$  700/75 nm); **(E)** Merged images A, C and D showing the localization of RM-581-Fluo (in blue), ER tracker (in red) and Cell-mask (in cyan); **(F)** Merged images B, C and D showing the localization of RM-581-Fluo (in green), ER tracker (in red), Cell-mask (in cyan) and a co-localization in yellow of RM-581-Fluo and ER-Tracker. Scale bar: 10  $\mu$ m.

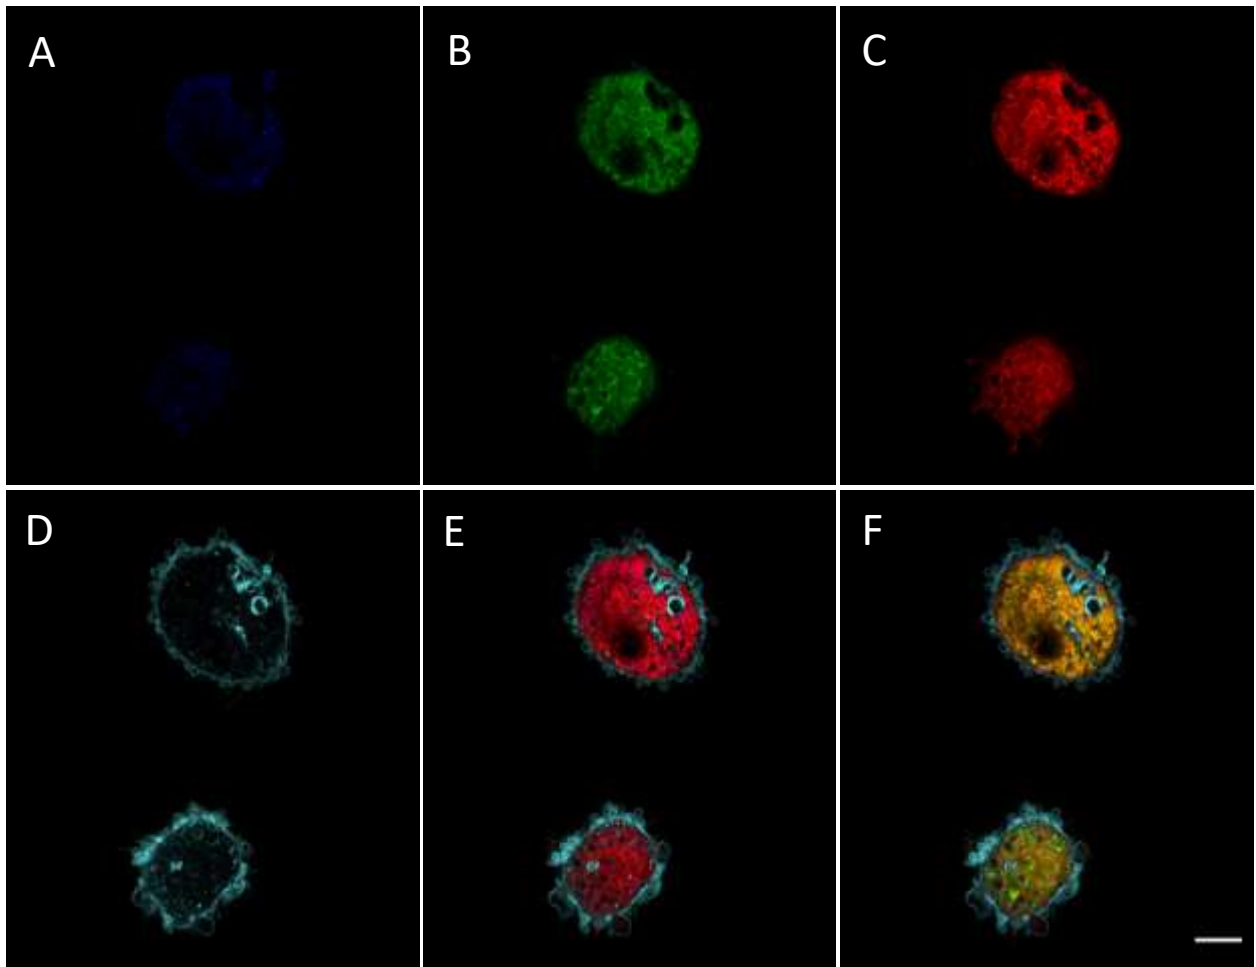

**Figure S3 (follow)**

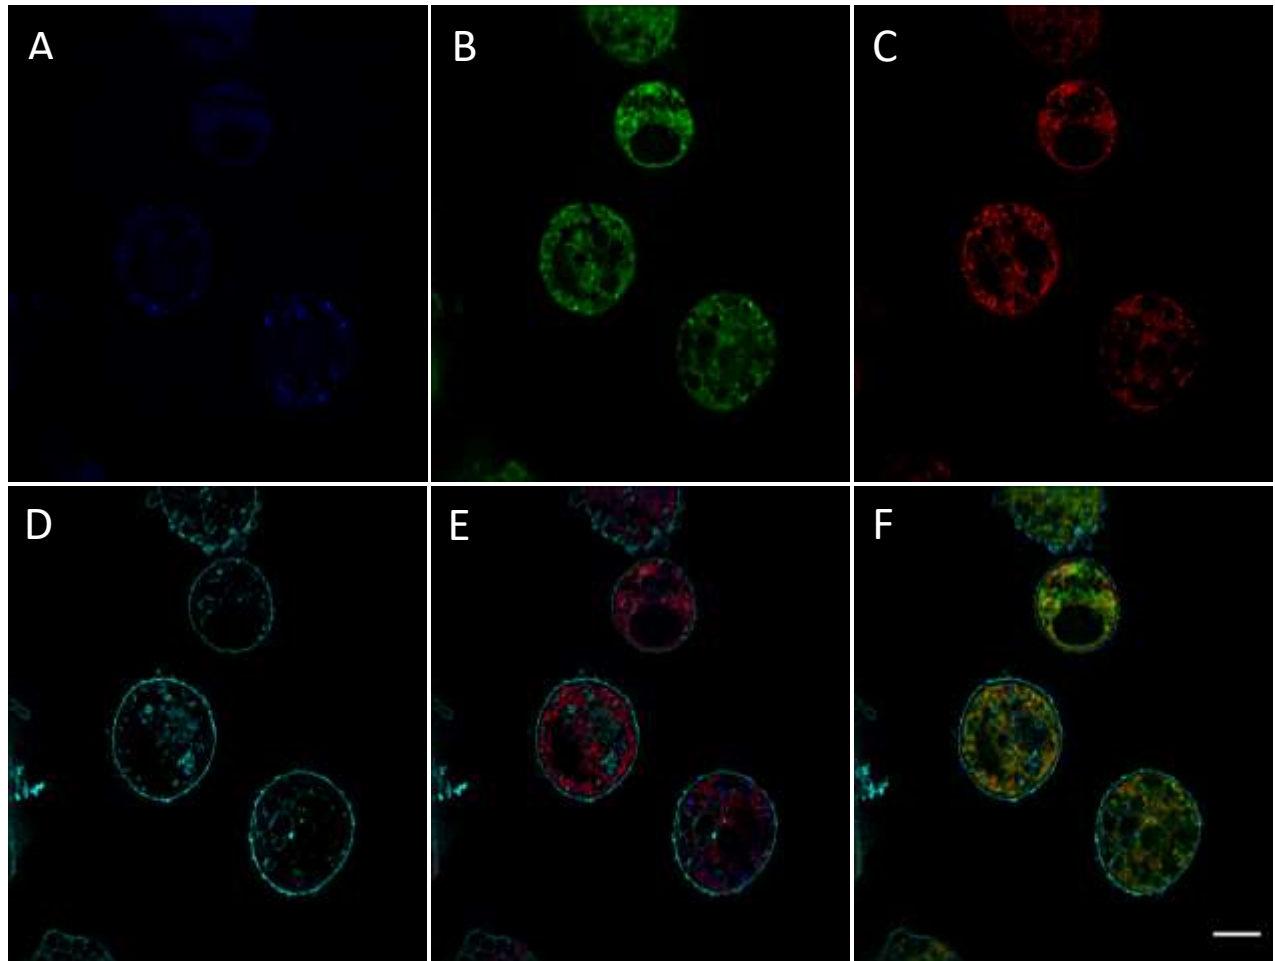

**Figure S3 (follow)**

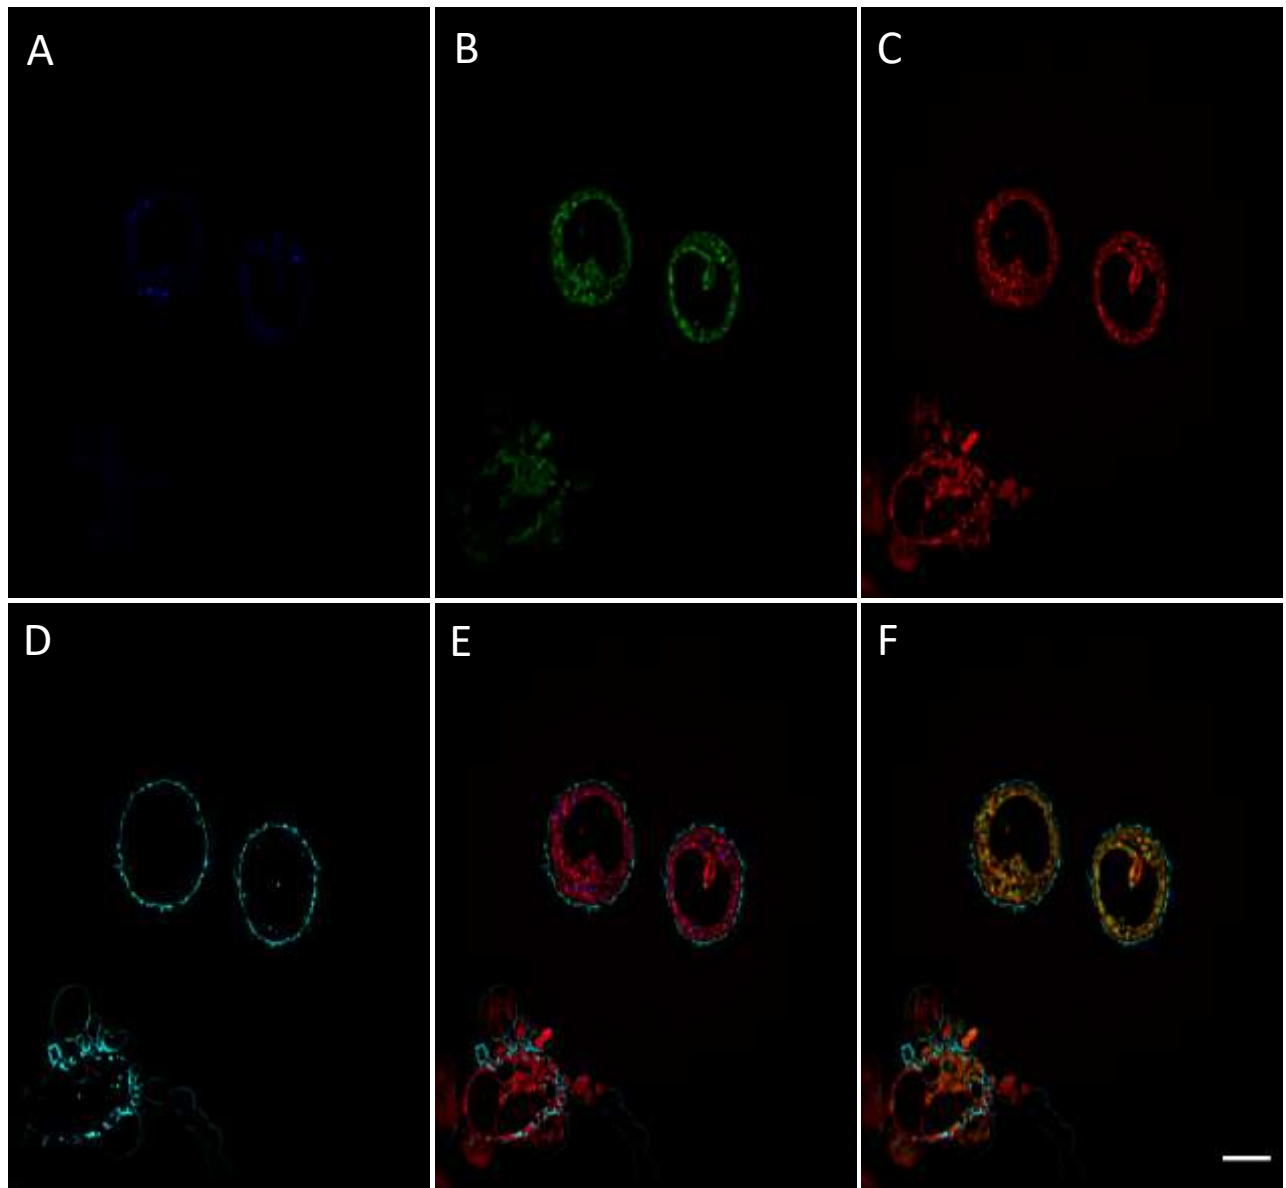

**Figure S4.** Cell proliferation and EC<sub>50</sub> values after continuous exposure to RM-581 in PC-3 cells. PC-3 cells did not develop resistance when treated with 0.8  $\mu$ M of RM-581. Cell proliferation and EC<sub>50</sub> values after 0 (A), 12 (B), 49 (C) and 119 (D) days of treatment with RM-581. EC<sub>50</sub> values are not significantly different.

**A** (EC<sub>50</sub> = 1.2  $\pm$  0.8  $\mu$ M)

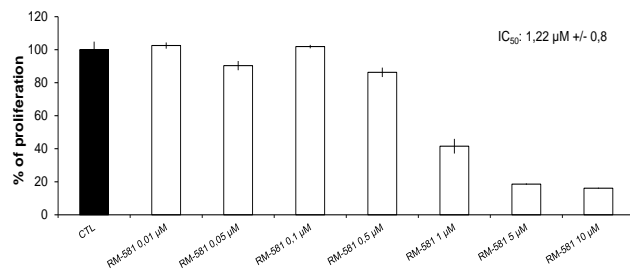

**B** (EC<sub>50</sub> = 1.1  $\pm$  0.5  $\mu$ M)

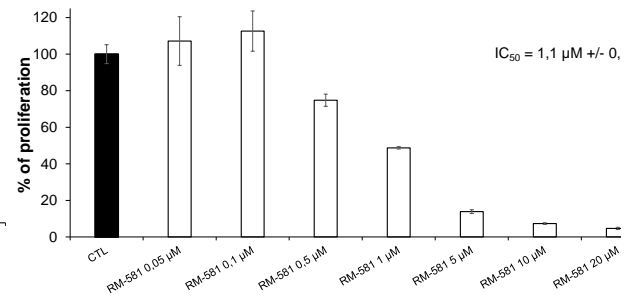

**C** (EC<sub>50</sub> = 1.6  $\pm$  0.6  $\mu$ M)

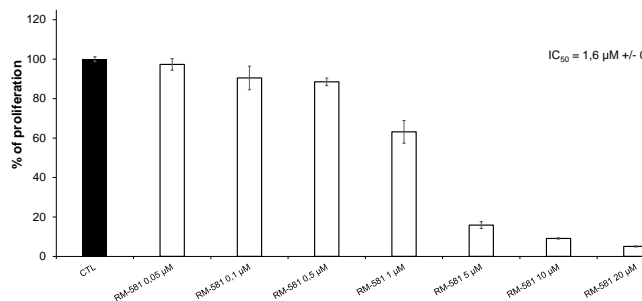

**D** (EC<sub>50</sub> = 0.8  $\pm$  0.4  $\mu$ M)

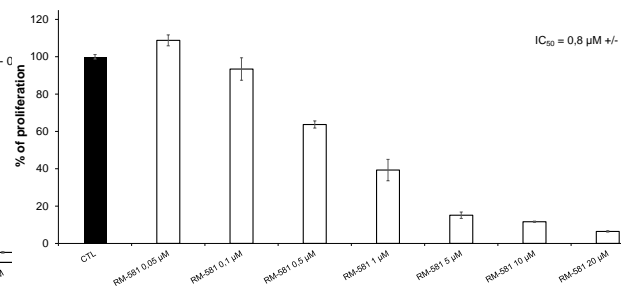

Supplement: s1 [file s1]
